# Supplementary material for: Diet and Lifestyle Before and During Pregnancy – Practical Recommendations of the Germany-wide Healthy Start – Young Family Network
Source: PubMed Central journal article supplement — Geburtshilfe Frauenheilkd. 2018 Sep 25;78(12):1262–82. doi: 10.1055/a-0713-1058 (PMC6294644; doi:10.1055/a-0713-1058), 2018-09-25
Supplement: 10-1055-a-0713-1058-sup_de_gf.pdf [file 10-1055-a-0713-1058-sup_de_gf.pdf]

Supplement Tabelle 1

Kohortenstudien, die im Kontext zu IOM Empfehlungen stehen.

| Referenz<br>(Autor/Journal/Titel)                                                                                                                                                                     | Studientyp          | Endpunkt/ Outcome                                                                                                                                                                                                                                                                                                                                                           | Fallzahl                                                                                                                     | Deskriptive und quantitative<br>Effektbeschreibung                                                                                                                                                                                                                            | Conclusio                                                                                                                     |
|-------------------------------------------------------------------------------------------------------------------------------------------------------------------------------------------------------|---------------------|-----------------------------------------------------------------------------------------------------------------------------------------------------------------------------------------------------------------------------------------------------------------------------------------------------------------------------------------------------------------------------|------------------------------------------------------------------------------------------------------------------------------|-------------------------------------------------------------------------------------------------------------------------------------------------------------------------------------------------------------------------------------------------------------------------------|-------------------------------------------------------------------------------------------------------------------------------|
| Beyerlein A, Schiessl B, Lack N et al.<br><i>Am J Clin Nutr</i> 2009;<br>90:1552-8<br><br>Optimal gestational weight gain ranges for the avoidance of adverse birth weight outcomes: a novel approach | Observational study | Statistical Analyses of joint predicted risks (JPRs) of SGA or LGA in relation to GWG;<br>Comparison with IOM criteria                                                                                                                                                                                                                                                      | N = 177.079 mature singleton deliveries (gestation $\geq$ 37 l weeks)<br>Maternal and neonatal data from Bavaria (2004-2006) | Estimated JPRs of $\leq$ 20 % = “optimal” GWG:<br><b>Underweight women</b> (BMI < 18,5): 8 - 25 kg<br><b>Normalweight women</b> (BMI $\geq$ 18,5-< 25): 2 - 18 kg<br><b>Overweight women</b> (BMI $\geq$ 25- < 30): -7 – 12<br><b>Obese women</b> (BMI $\geq$ 30: - 15 – 2 kg | The “optimal” GWG ranges were considerably wider and, particularly for obese mothers, lower than corresponding IOM categories |
| Beyerlein A, Lack N, von Kries R.<br><i>Obstet Gynecol</i> 2010; 116(5): 1111-8<br><br>Within-population average ranges compared with Institute of Medicine recommendations                           | Observational study | Calculation of the prevalence of following outcome in GWG-Ranges according to IOM an in interquartile ranges IQR (25th to 75th percentile) and interdecile ranges IDR (10th to 90th percentile):<br><ul style="list-style-type: none"> <li>• preeclampsia</li> <li>• gestational diabetes</li> <li>• nonelective cesarean delivery</li> <li>• SGA</li> <li>• LGA</li> </ul> | N = 678,560 singleton deliveries in Bavarian obstetric units (2000 to 2007)                                                  | <b>Underweight women</b><br>Preterm delivery<br>GWG-IOM 5,22 (4,84-5,60)<br>GWG-IQR 7,14* (6,78-7,52)<br>GWG-IDR 7,57* (7,24-7,90)<br><br>SGA<br>GWG-IOM 12.09 (11.54–12.65)<br>GWG-IQR 14.26* (13.70–14.82)                                                                  | Perinatal outcomes are likely to be improved if underweight and normal-weight pregnant women adapt their gestational          |

| Referenz<br>(Autor/Journal/Titel) | Studientyp | Endpunkt/ Outcome                                                                                                                                                                                                                                                                                                                                                                                                                                                                                                                                                          | Fallzahl | Deskriptive und<br>quantitative<br>Effektbeschreibung                                                                                                                                                                                                                                                                                                                                                                                                                                                                                                        | Conclusio                                                                                                                                                                                                                                                                                                                               |
|-----------------------------------|------------|----------------------------------------------------------------------------------------------------------------------------------------------------------------------------------------------------------------------------------------------------------------------------------------------------------------------------------------------------------------------------------------------------------------------------------------------------------------------------------------------------------------------------------------------------------------------------|----------|--------------------------------------------------------------------------------------------------------------------------------------------------------------------------------------------------------------------------------------------------------------------------------------------------------------------------------------------------------------------------------------------------------------------------------------------------------------------------------------------------------------------------------------------------------------|-----------------------------------------------------------------------------------------------------------------------------------------------------------------------------------------------------------------------------------------------------------------------------------------------------------------------------------------|
| for gestational<br>weight gain    |            | <ul style="list-style-type: none"> <li>• preterm delivery (before 37+0 completed weeks of gestation, irrespective of underlying cause) stillbirths</li> <li>• early neonatal deaths (within the first 7 days of life).</li> </ul> <p>GWG Ranges</p> <p>Underweight women<br/>IOM 12,5 – 18,0 kg<br/>IQR 11-16 kg<br/>IDR 8-20 kg</p> <p>Normalweight women<br/>IOM 11,5-16,0 kg<br/>IQR 11-17 kg<br/>IDR 7-20 kg</p> <p>Overweight women<br/>IOM 7,0 – 11,5 kg<br/>IQR 10- 17 kg<br/>IDR 7-20 kg</p> <p>Obese women<br/>IOM 5,0-9,0 kg<br/>IQR 7-15 kg<br/>IDR 3-19 kg</p> |          | <p>GWG-IDR 14.61* (14.18–15.04)</p> <p><b>Overweight women:</b><br/>Preeclampsia<br/>GWG-IOM 1.66 (1.53–1.78)<br/>GWG-IQR 2.30* (2.20–2.41)<br/>GWG-IDR 2.38* (2.29–2.47)</p> <p>GDM<br/>GWG-IOM 2,30 (2,15-2,45)<br/>GWG-IQR 1,69* (1,60-1,78)<br/>GWG-IDR 1,82* (1,74-1,90)</p> <p>Nonelective cesarean delivery<br/>GWG-IOM 11.55 (11.22–11.87)<br/>GWG-IQR 13.31 (13.07–13.55)*<br/>GWG-IDR 13.49 (13.29–13.69)*</p> <p><b>Obese women</b><br/>Preeclampsia<br/>GWG-IOM 4.94 (4.64–5.24)<br/>GWG-IQR 6.23 (5.99–6.47)*<br/>GWG-IDR 6.30 (6.10–6.50)*</p> | <p>weight gain to the Institute of Medicine criteria.</p> <p>Overweight and obese mothers seem to increase the risks for adverse perinatal outcomes related to the offspring such as SGA, gestational age, preterm delivery and perinatal mortality if they restrict their gestational weight gain to the ranges recommended by IOM</p> |

| Referenz<br>(Autor/Journal/Titel)                                                                                                                                                                                                                    | Studientyp                                  | Endpunkt/ Outcome                                                                                                                                                                                                                                                                                                                                                                                                                   | Fallzahl                                                                                 | Deskriptive und<br>quantitative<br>Effektbeschreibung                                                                                                                                                                                                                                                                                                             | Conclusio                                                                                                                                                 |
|------------------------------------------------------------------------------------------------------------------------------------------------------------------------------------------------------------------------------------------------------|---------------------------------------------|-------------------------------------------------------------------------------------------------------------------------------------------------------------------------------------------------------------------------------------------------------------------------------------------------------------------------------------------------------------------------------------------------------------------------------------|------------------------------------------------------------------------------------------|-------------------------------------------------------------------------------------------------------------------------------------------------------------------------------------------------------------------------------------------------------------------------------------------------------------------------------------------------------------------|-----------------------------------------------------------------------------------------------------------------------------------------------------------|
|                                                                                                                                                                                                                                                      |                                             |                                                                                                                                                                                                                                                                                                                                                                                                                                     |                                                                                          | Preterm delivery<br>GWG-IOM 8.58 (8.19–8.96)<br>GWG-IQR 7.10 (6.84–7.36)*<br>GWG IDR 7.42 (7.21–7.64)*<br><br>SGA<br>GWG-IOM 7.26 (6.90–7.62)<br>GWG-IQR 6.33 (6.08–6.57)*<br>GWG-IDR 6.41 (6.20–6.61)*<br>*P <0,001                                                                                                                                              |                                                                                                                                                           |
| Rogozinska E, Marlin N, Jackson L, Rayanagoudar G, <i>et al.</i><br><i>Health Technol Assess</i> 2017;21(41)<br><br>Effects of antenatal diet and physical activity on maternal and fetal outcomes: individual patient data meta-analysis and health | Individual patient data (IPD) meta-analysis | analysis to assess if the effects of diet- and physical activity-based interventions on GWG, composite maternal and composite fetal/neonatal outcomes vary in subgroups of women based on BMI at booking, age, parity, ethnicity and underlying medical conditions<br><br>Adverse maternal effect: gestational diabetes mellitus, pre-eclampsia or pregnancy-induced hypertension, preterm delivery (< 37 weeks), Caesarean section | GWG: 9320 participants<br>Maternal composite: 8852<br>Fetal and neonatal composite: 7981 | <b>Composite adverse maternal effects / fetal complications</b><br>Normalweight women<br>Below IOM: 0,99 (summary OR; 0,67-1,46) <i>0.87 (0.40 to 1.90)</i><br>Exceeds IOM: 1,05 (0,61-1,80) <i>1.26 (0.60 to 2.65)</i><br>Overweight women<br>Below IOM: 1,28 (0,79-2,08) <i>1.07 (0.51 to 2.22)</i><br>Exceeds IOM: 0,78 (0,49-1,26) <i>1.09 (0.68 to 1.74)</i> | The odds of adverse composite outcome were not significant when normal weight, overweight and obese women gained above and below the recommended targets. |

| Referenz<br>(Autor/Journal/Titel)    | Studientyp | Endpunkt/ Outcome                                                                                                                      | Fallzahl | Deskriptive und<br>quantitative<br>Effektbeschreibung                                                                                                    | Conclusio |
|--------------------------------------|------------|----------------------------------------------------------------------------------------------------------------------------------------|----------|----------------------------------------------------------------------------------------------------------------------------------------------------------|-----------|
| economic<br>evaluation. <sup>1</sup> |            | Fetal outcome:<br>intrauterine death, small for<br>gestational age fetus, large for<br>gestational age fetus, admission to<br>the NICU |          | Obese women<br>Below IOM:1,38 (0,95-2,01)<br><i>1.57 (1.05 to 2.32)</i><br>Exceeds IOM: 1,15 (0,85 –<br>1,56) <i>1.36 (0.89 to 2.06)</i><br><sup>2</sup> |           |

<sup>1</sup> <https://www.journalslibrary.nihr.ac.uk/hta/hta21410#/abstract>

<sup>2</sup> <https://www.journalslibrary.nihr.ac.uk/hta/hta21410#/s6>
